# Supplementary material for: High-throughput flowing upstream sperm sorting in a retarding flow field for human semen analysis
Source: Royal Society of Chemistry journal article supplement (doi:10.1039/c6an02420c), 2017-01-01
Supplement: c6an02420c1.pdf [file c6an02420c1.pdf]

## **High-Throughput Flowing Upstream Sperm Sorting (FUSS) in a Retarding Flow Field for Human Semen Analysis**

Jen-Kuei Wu<sup>1</sup>, Peng-Chun Chen<sup>1</sup>, Yu-Nan Lin<sup>1</sup>, Chia-Woei Wang<sup>3</sup>, Li-Chern Pan<sup>\*,2</sup>, and Fan-Gang Tseng<sup>\*,1,4</sup>

<sup>1</sup>Department of Engineering and System Science, National Tsing Hua University, Hsinchu, Taiwan ROC.

<sup>2</sup>Department of General Education, Taipei Medical University, Taipei, Taiwan ROC.

<sup>3</sup>Department of Gynecology and Obstetrics, Taipei Medical University and Hospital, Taipei, Taiwan ROC.

<sup>4</sup>Division of Mechanics, Research Center for Applied Sciences, Academia Sinica, Taipei 115, Taiwan ROC

Corresponding author; E-mail: [rlcpan0316@gmail.com](mailto:rlcpan0316@gmail.com)(L.-C. Pan) & [fangang@ess.nthu.edu.tw](mailto:fangang@ess.nthu.edu.tw)

(F.-G. Tseng)

Phone number: 886-3-5715131 ext. 34270 (F.-G. Tseng)

Fax number: 886-3-5733054 (F.-G. Tseng)

Address: #101, Sec. 2, Kuang-Fu Rd., Hsinchu, Taiwan ROC

### Supplemental Methods

CASA acquires images of sperm within a specific time period and in order to trace the trajectories of the sperm. Three indexes were used to assess velocity of the sperm: curvilinear velocity (VCL), velocity average path (VAP), and straight line velocity (VSL), as shown in Fig S1. The CASA system was used to classify sperm according to mobility at the following four levels (G0=0, G1=0-120, G2=120-180, G3>180  $\mu\text{m/s}$ ).

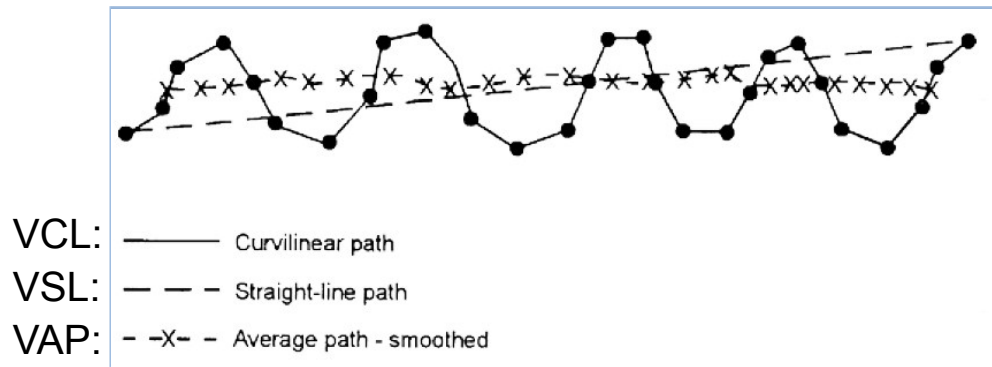

**Supplementary Figure S1. Scheme of kinematic analysis of sperm by CASA.** Linearity (LIN%) =  $(\text{VSL}/\text{VCL}) \times 100$ ,  
Straightness (STR%) =  $(\text{VSL}/\text{VAL}) \times 100$ , Wobble (WOB%) =  $(\text{VAP}/\text{VCL}) \times 100$ .

As we known, Poiseuille's equation (eq. 1) can be used to determine the pressure drop of a constant viscosity fluid exhibiting laminar flow through a rigid pipe. Here, we used it to get the value of flow rate in quadrature channel geometry, and then put them into the formula of Continuity equation (eq. 2) to calculate the value of velocity at relative position.

$$Q = \frac{\pi D_h^4 \rho g h}{128 \eta L} \dots\dots\dots(1)$$

Here,  $D_h = \frac{4A}{P}$

$V = Q/A \dots\dots\dots(2)$

Here, V= Avg. velocity, A= cross sectional area

| Width (μm)                                | 100   | 200   | 300   | 400   | 500   | 600   | 700   | 800   | 900   | 1000  |
|-------------------------------------------|-------|-------|-------|-------|-------|-------|-------|-------|-------|-------|
| <b>Theoretical (Hagen Poiseuille Eq.)</b> | 550   | 276   | 184   | 138   | 110   | 92    | 79    | 69    | 62    | 55    |
|                                           | μ m/s |
| <b>Relative velocity level</b>            | G3    | G3    | G3    | G2    | G1    | G1    | G1    | G1    | G1    | G1    |
| <b>Experimental (PIV measurement)</b>     | 554   | 261   | 187   | -     | -     | -     | -     | -     | 72    | 60    |
|                                           | μ m/s | μ m/s | μ m/s |       |       |       |       |       | μ m/s | μ m/s |
| <b>Relative velocity level</b>            | G3    | G3    | G3    | -     | -     | -     | -     | -     | G1    | G1    |

**Supplementary Table S1. Velocity distribution calculated by Poiseuille's equation in different position of channel compared with PIV measurement.** In Zone 1 area, the avg. velocity all high than 180 μm/s (G3 level), we could sort the highest mobility sperm by this design if they can stay in this room to against the flow rate.

**Conditions:**

$D_h$ , hydraulic diameter =  $4 \cdot A/P$ , ( $A = W \cdot H = 100 \times 100 \times 10^{-12} \text{ m}^2$ ,  $P = 2(W+H) = 400 \times 10^{-6} \text{ m}$ )

$\rho$ , density =  $1000 \text{ kg/m}^3$

$g$ , gravitational constant =  $9.8 \text{ m/s}^2$

$h$ , height of droplet =  $3 \times 10^{-3} \text{ m}$

$\eta$ , coefficient of viscosity =  $1.002 \times 10^{-3} \text{ Pa} \cdot \text{S} = 1.002 \times 10^{-3} \text{ kg} \cdot \text{m}^{-1} \cdot \text{s}^{-1}$

$L$ , straight channel length =  $10.5 \times 10^{-3} \text{ m}$

Recovery ratio was evaluated by computer-assisted semen analysis (CASA) for sperm motility with three different qualities by chip-based method was shown in Table S2. Before each testing, the semen sample (original concentration:  $\sim 1 \times 10^7$  cells/ml) was diluted with 50% Ham's F10 medium (prepared by 100 mM HEPES buffer) in the volume ratio of 1:10. As in our sorting protocol, the maximum volume of chip processing capability is 100  $\mu$ l for about 45 mins.

| Case | Original Concentration (cells/ml) | Recovery rate (count in 1 $\mu$ L, %) | G0 (%) | G1 (%) | G2 (%) | G3 (%) |
|------|-----------------------------------|---------------------------------------|--------|--------|--------|--------|
| 1    | $1.0 \times 10^7$                 | 9149/11462 (79.8)                     | 0.3    | 77.2   | 12.7   | 8.9    |
| 2    | $1.0 \times 10^7$                 | 8342/10132 (82.3)                     | 23.8   | 57.6   | 14.5   | 3.9    |
| 3    | $1.2 \times 10^7$                 | 9251/11312 (81.7)                     | 4.0    | 70.3   | 13.4   | 9.2    |
| 7    | $1.1 \times 10^7$                 | 9185/11423 (80.4)                     | 16.3   | 64.0   | 12.6   | 7.2    |
| 8    | $1.2 \times 10^7$                 | 8986/11256 (79.8)                     | 12.8   | 62.4   | 19.8   | 5.2    |
| 9    | $1.1 \times 10^7$                 | 8269/10337 (80.0)                     | 15.6   | 70.5   | 8.3    | 5.9    |
| 12   | $1.0 \times 10^7$                 | 7829/9986 (78.4)                      | 11.4   | 68.6   | 13.6   | 8.2    |
| 13   | $1.0 \times 10^7$                 | 7954/9943 (79.9)                      | 24.8   | 60.2   | 9.5    | 6.8    |
| 14   | $1.1 \times 10^7$                 | 9018/11238 (80.2)                     | 36.8   | 49.7   | 14.2   | 4.5    |

**Supplementary Table S2.** Sorting Results of Clinical Samples in Figure 4 from CASA Analysis. Pick up 9 persons among these 15 cases (six were deemed healthy (No.1-6), five were found to be moderately infertile (No.7-11), and the other four (No.12-15) were severe infertile) were tested on chip-based method.

For case 1-3: healthy case, the absolute number of the sperms counted in 1  $\mu$ l is in the range of  $8914 \pm 406$  with 81.3% recovery rate.

For case 7-9: moderately infertile case, the absolute number of the sperms counted in 1  $\mu$ l is in the range of  $8813 \pm 393$  with 80.1% recovery rate.

For case 12-14: severe infertile case, the absolute number of the sperms counted in 1  $\mu$ l is in the range of  $8267 \pm 533$  with 79.5% recovery rate.

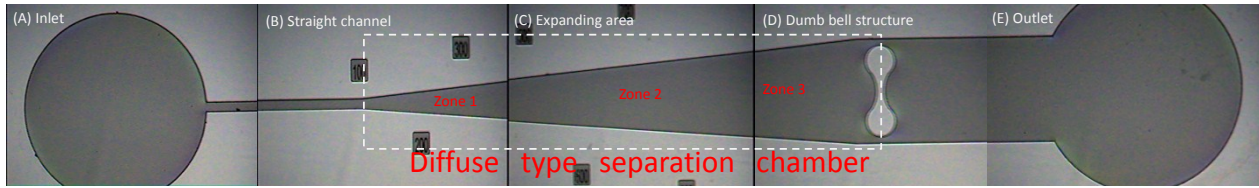

|                             | <b>G0</b> | <b>G1</b> | <b>G2</b> | <b>G3</b> |
|-----------------------------|-----------|-----------|-----------|-----------|
| <b><i>in 5 mins</i></b>     |           |           |           |           |
| <b>Inlet</b>                | 23.50%    | 70.16%    | 5.69%     | 0.68%     |
| <b>Zone 1</b>               | 0.00%     | 57.40%    | 27.90%    | 14.70%    |
| <b>Zone 2</b>               | 5.60%     | 87.60%    | 6.20%     | 0.60%     |
| <b>Zone 3</b>               | 19.90%    | 71.60%    | 7.10%     | 1.40%     |
| <b>In front of dumbbell</b> | 56.00%    | 35.80%    | 6.40%     | 1.80%     |
| <b>behind of dumbbell</b>   | 66.30%    | 32.60%    | 1.10%     | 0.00%     |
| <b>Outlet</b>               | 90.00%    | 10.00%    | 0.00%     | 0.00%     |
|                             |           |           |           |           |
| <b><i>in 10 mins</i></b>    |           |           |           |           |
| <b>Inlet</b>                | 23.46%    | 70.16%    | 5.69%     | 0.68%     |
| <b>Zone 1</b>               | 10.67%    | 81.33%    | 6.67%     | 1.33%     |
| <b>Zone 2</b>               | 47.42%    | 43.30%    | 7.22%     | 2.06%     |
| <b>Zone 3</b>               | 68.75%    | 29.17%    | 1.04%     | 1.04%     |
| <b>In front of dumbbell</b> | 76.34%    | 23.66%    | 0.00%     | 0.00%     |
| <b>behind of dumbbell</b>   | 100.00%   | 0.00%     | 0.00%     | 0.00%     |
| <b>Outlet</b>               | 100.00%   | 0.00%     | 0.00%     | 0.00%     |
|                             |           |           |           |           |
| <b><i>in 15 mins</i></b>    |           |           |           |           |
| <b>Inlet</b>                | 23.46%    | 70.16%    | 5.69%     | 0.68%     |
| <b>Zone 1</b>               | 0.00%     | 37.50%    | 41.25%    | 21.25%    |
| <b>Zone 2</b>               | 2.56%     | 83.33%    | 12.18%    | 1.92%     |
| <b>Zone 3</b>               | 27.38%    | 59.52%    | 10.71%    | 2.38%     |
| <b>In front of dumbbell</b> | 62.07%    | 36.21%    | 1.72%     | 0.00%     |
| <b>behind of dumbbell</b>   | 80.00%    | 17.78%    | 2.22%     | 0.00%     |
| <b>Outlet</b>               | 95.24%    | 0.00%     | 4.76%     | 0.00%     |

**Supplementary Table S3. Results of distribution ratio of sperm's mobility in several different positions of channel.** The results of viability analysis (figure 2b) also fit the data that calculated the ratio of sperm's mobility in different relative position of channel by CASA analysis.

It was evaluated by computer-assisted semen analysis (CASA) for sperm motility treated with different buffer solutions by three different methods was shown in Table S4. The various components and concentration of dilute buffer will have different degrees of impact on normal sperm (pure sample, case 1, 3, 5 diluted with different solution); Case1 has suffered the minimize impact from dilute buffer, it is because of dilution liquid formulation is the lowest concentration and most simple components among of these three dilute solution.

It can be observed that different sorting methods will have different degrees of impact on normal sperm (prepared sample, case 2, 4, 6 sorted by different method). It shows that the sperms' velocity decreases slightly for case 2 after sorted by this reported FUSS method. Thanks for the shortly sorting time reduces the amount of energy consumed by the sperm during the screening process, it has the minimize damage effect on normal semen.

| Case | Concentration<br>(cells/ml) | Mobility rate<br>(%, count in<br>10 $\mu$ L) | VAP<br>( $\mu$ m/s) | VSL<br>( $\mu$ m/s) | VCL<br>( $\mu$ m/s) | G0<br>(%) | G1<br>(%) | G2<br>(%) | G3<br>(%) |
|------|-----------------------------|----------------------------------------------|---------------------|---------------------|---------------------|-----------|-----------|-----------|-----------|
| 1    | 1.6X10 <sup>8</sup>         | 1149/1462<br>(78.6)                          | 81.8                | 45.4                | 183.3               | 23.4      | 70.2      | 5.7       | 0.7       |
| 2    | 5.4X10 <sup>7</sup>         | 342/1066<br>(32.1)                           | 82.7                | 43.7                | 180.5               | 38.8      | 51.2      | 4.5       | 0.5       |
| 3    | 1.5X10 <sup>8</sup>         | 1051/1312<br>(80.1)                          | 76.5                | 41.9                | 176.9               | 35.2      | 60.0      | 4.4       | 0.6       |
| 4    | 5.5X10 <sup>7</sup>         | 297/986<br>(30.1)                            | 62.7                | 34.1                | 160.3               | 64.0      | 46.0      | 0.0       | 0.0       |
| 5    | 1.2X10 <sup>8</sup>         | 1085/1423<br>(76.2)                          | 72.6                | 36.9                | 176.8               | 31.4      | 63.6      | 4.2       | 0.8       |
| 6    | 5.6X10 <sup>7</sup>         | 354/979<br>(36.2)                            | 50.2                | 20.4                | 149.7               | 65.8      | 34.2      | 0.0       | 0.0       |

**Supplementary Table S4. Results from CASA analysis.** Case 1: semen sample was diluted with 50% Ham's F10 medium (prepared by 100 mM HEPES buffer) in the volume ratio of 1:2; Case 2: sample prepared in case 1 was sorted by FUSS method; Case 3: semen sample was immersed in 100 % Ham's F10 medium; Case 4: sample prepared in case 3 was sorted by SU method; Case 5: a sperm gradient kit (K-SISG-50, two media with different concentrations (L80 and L40)) was added to the semen samples in the volume ratio of 1:10; Case 6: sample prepared in case 5 was sorted by DG. (FUSS: flowing upstream sperm sorter, SU: swim up, DG: density gradient).
